# Supplementary material
Source: PubMed Central journal article supplement (PMC4155658)
Supplement: supp_M114.570507_AMANO_SFig1_for_JBC_revision.pdf [file supp_M114.570507_AMANO_SFig1_for_JBC_revision.pdf]

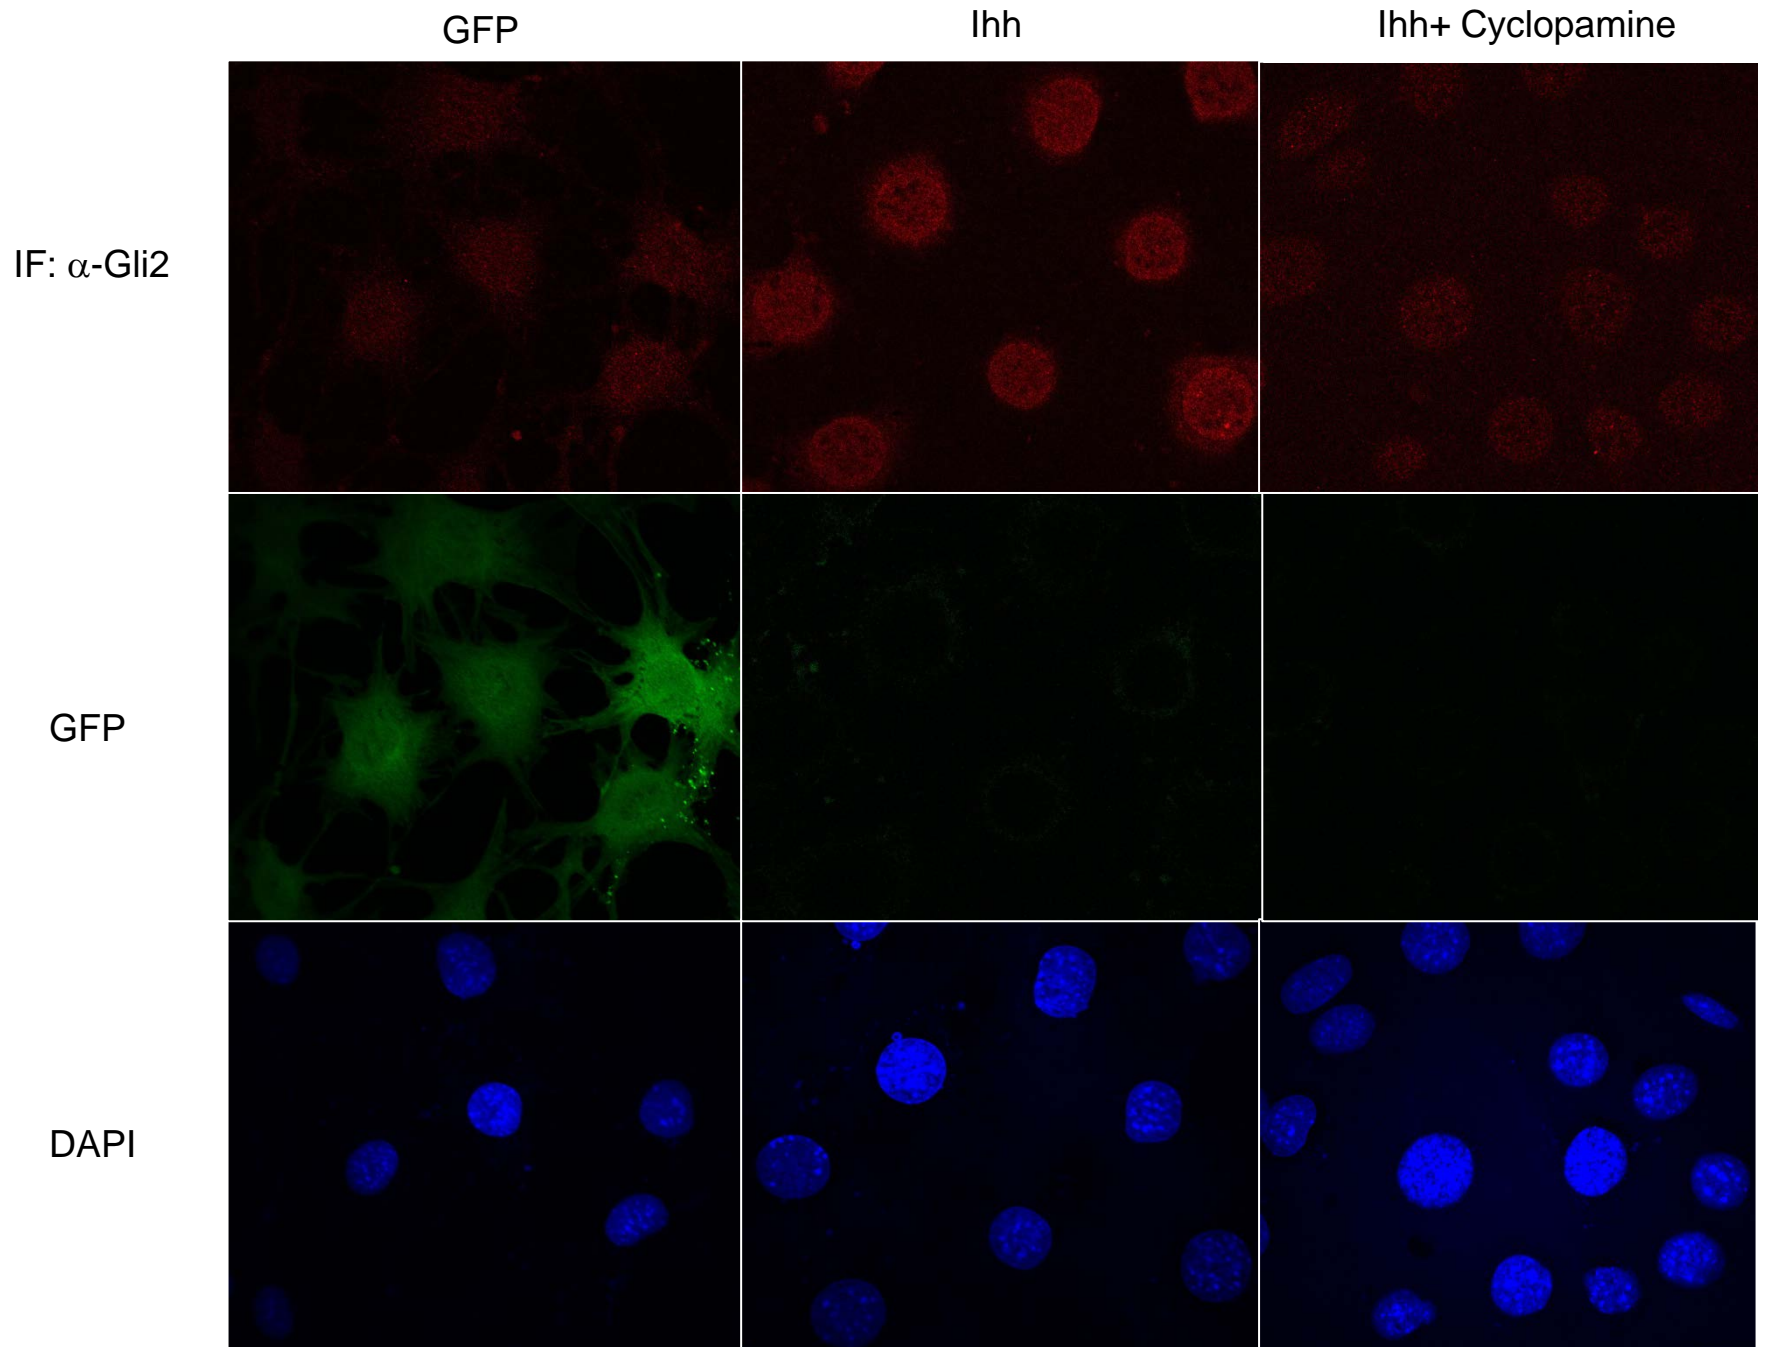

## **Supplemental Figure 1. Immunofluorescence of ATDC5 cells stimulated with Ihh.**

Ihh virus was overexpressed in ATDC5 cells with or without treatment of 5 $\mu$ M cyclopamine. Cells were subsequently immune-stained with anti-Gli2 antibody as mentioned in experimental procedures. GFP virus was used as a control. The representative data are shown here.
